# Supplementary material
Source: PubMed Central journal article supplement (PMC3567335)

## **Supplemental methods**

### **Bone marrow smear**

Bone marrow was flushed from femurs and tibias of WT and Tph1<sup>-/-</sup> mice into RPMI buffer and centrifuged at 600g for 10 minutes at RT, followed by resuspension, smearing on glass slides, and May-Gruenwald-Giemsa staining for blinded analysis by light microscopy at 100x (Axiovert 200M, Zeiss) according to standard hematological cell morphology parameters.

### **Generation of bone marrow chimera**

After lethal irradiation with 900 cGy (2x450 cGy),  $5 \times 10^6$  WT or Tph1<sup>-/-</sup> femur and tibia marrow cells were injected intravenously into WT or Tph1<sup>-/-</sup> recipient mice, combining the following donor-recipient pairs: WT → WT, Tph1<sup>-/-</sup> → WT, WT → Tph1<sup>-/-</sup>, Tph1<sup>-/-</sup> → Tph1<sup>-/-</sup>.

## **Supplemental figure legends**

**Figure S1. Granulopoiesis is normal in Tph1<sup>-/-</sup> mice.** Bone marrow smear analysis (n = 6, there were no significant differences between WT and Tph1<sup>-/-</sup> mice).

**Figure S2. Decreased leukocyte rolling and adhesion in Tph1<sup>-/-</sup> mice depends on serotonin produced by non-hematopoietic cells.** A) Rhodamine-stained leukocyte rolling in resting mesenteric veins of WT and Tph1<sup>-/-</sup> mice pre-treated with an intraperitoneal injection of serotonin or vehicle after laparotomy without further stimulation. B) Leukocyte adhesion after LPS challenge in WT and Tph1<sup>-/-</sup> mice pre-treated with an intraperitoneal injection of serotonin or vehicle. C) Serum serotonin levels in bone marrow chimeric mice. B) Leukocyte rolling in resting mesenteric veins of bone marrow chimeric mice. N = 4-6.

Figure S1

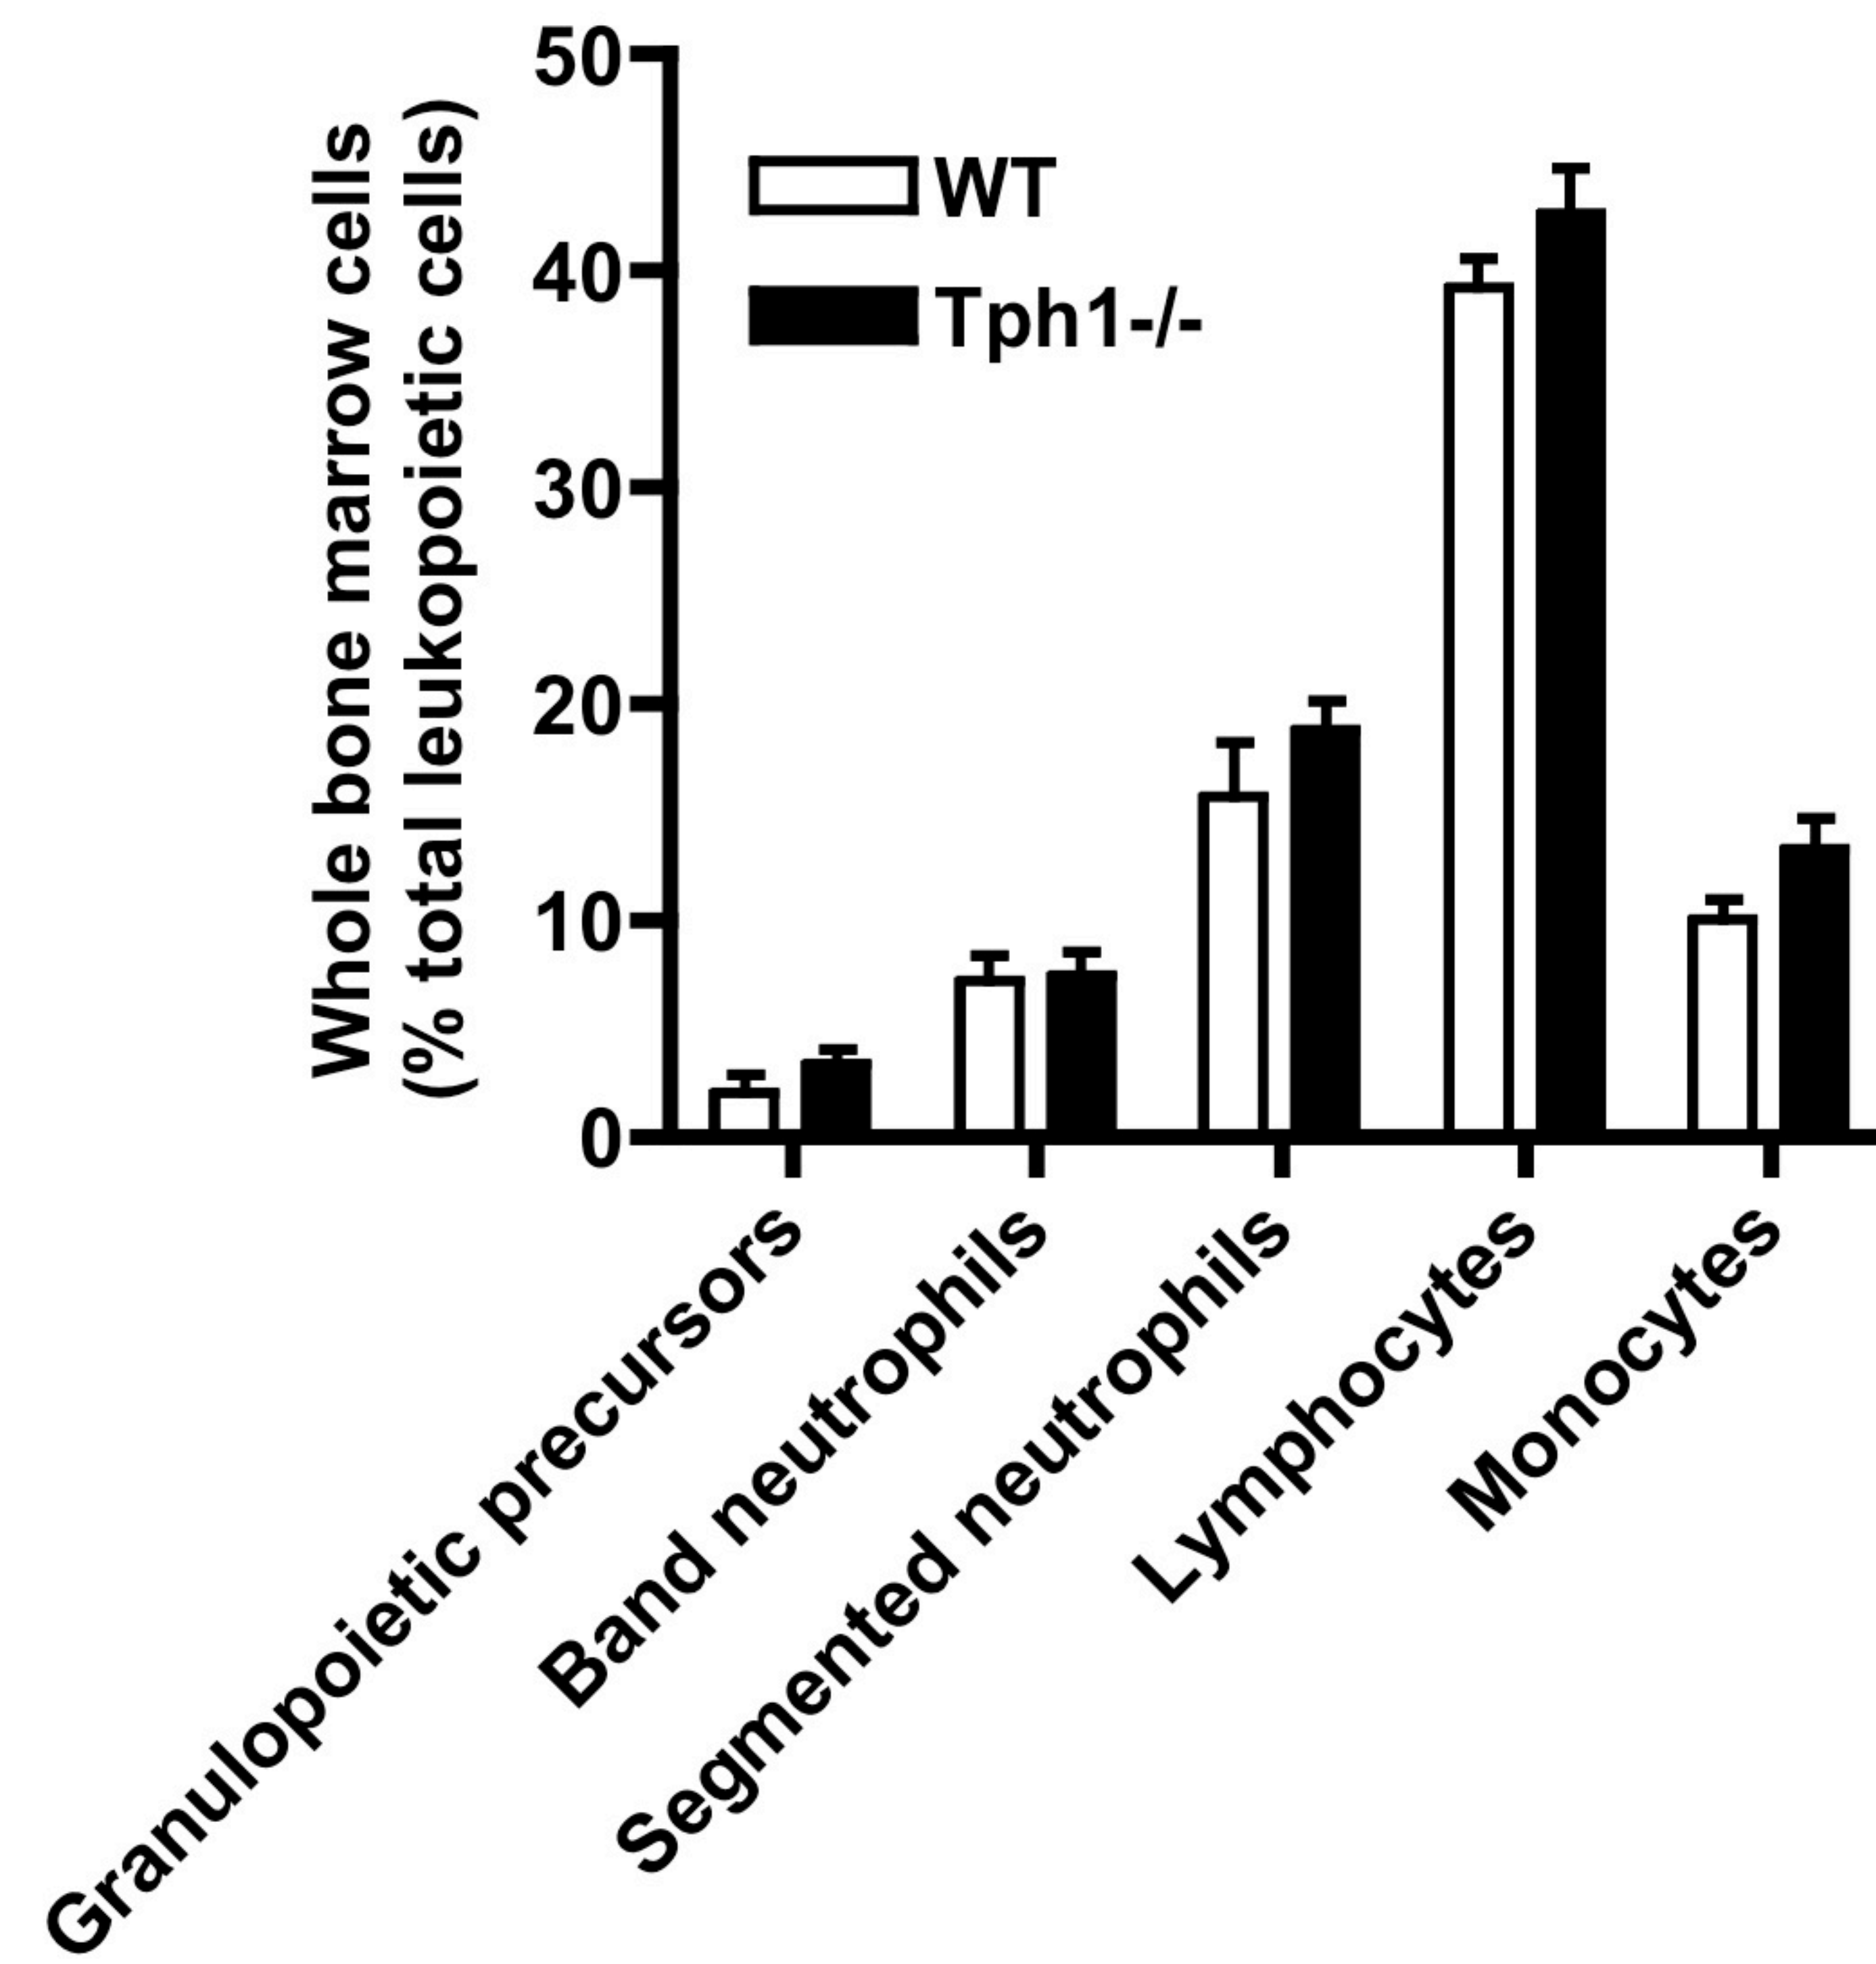

Figure S2

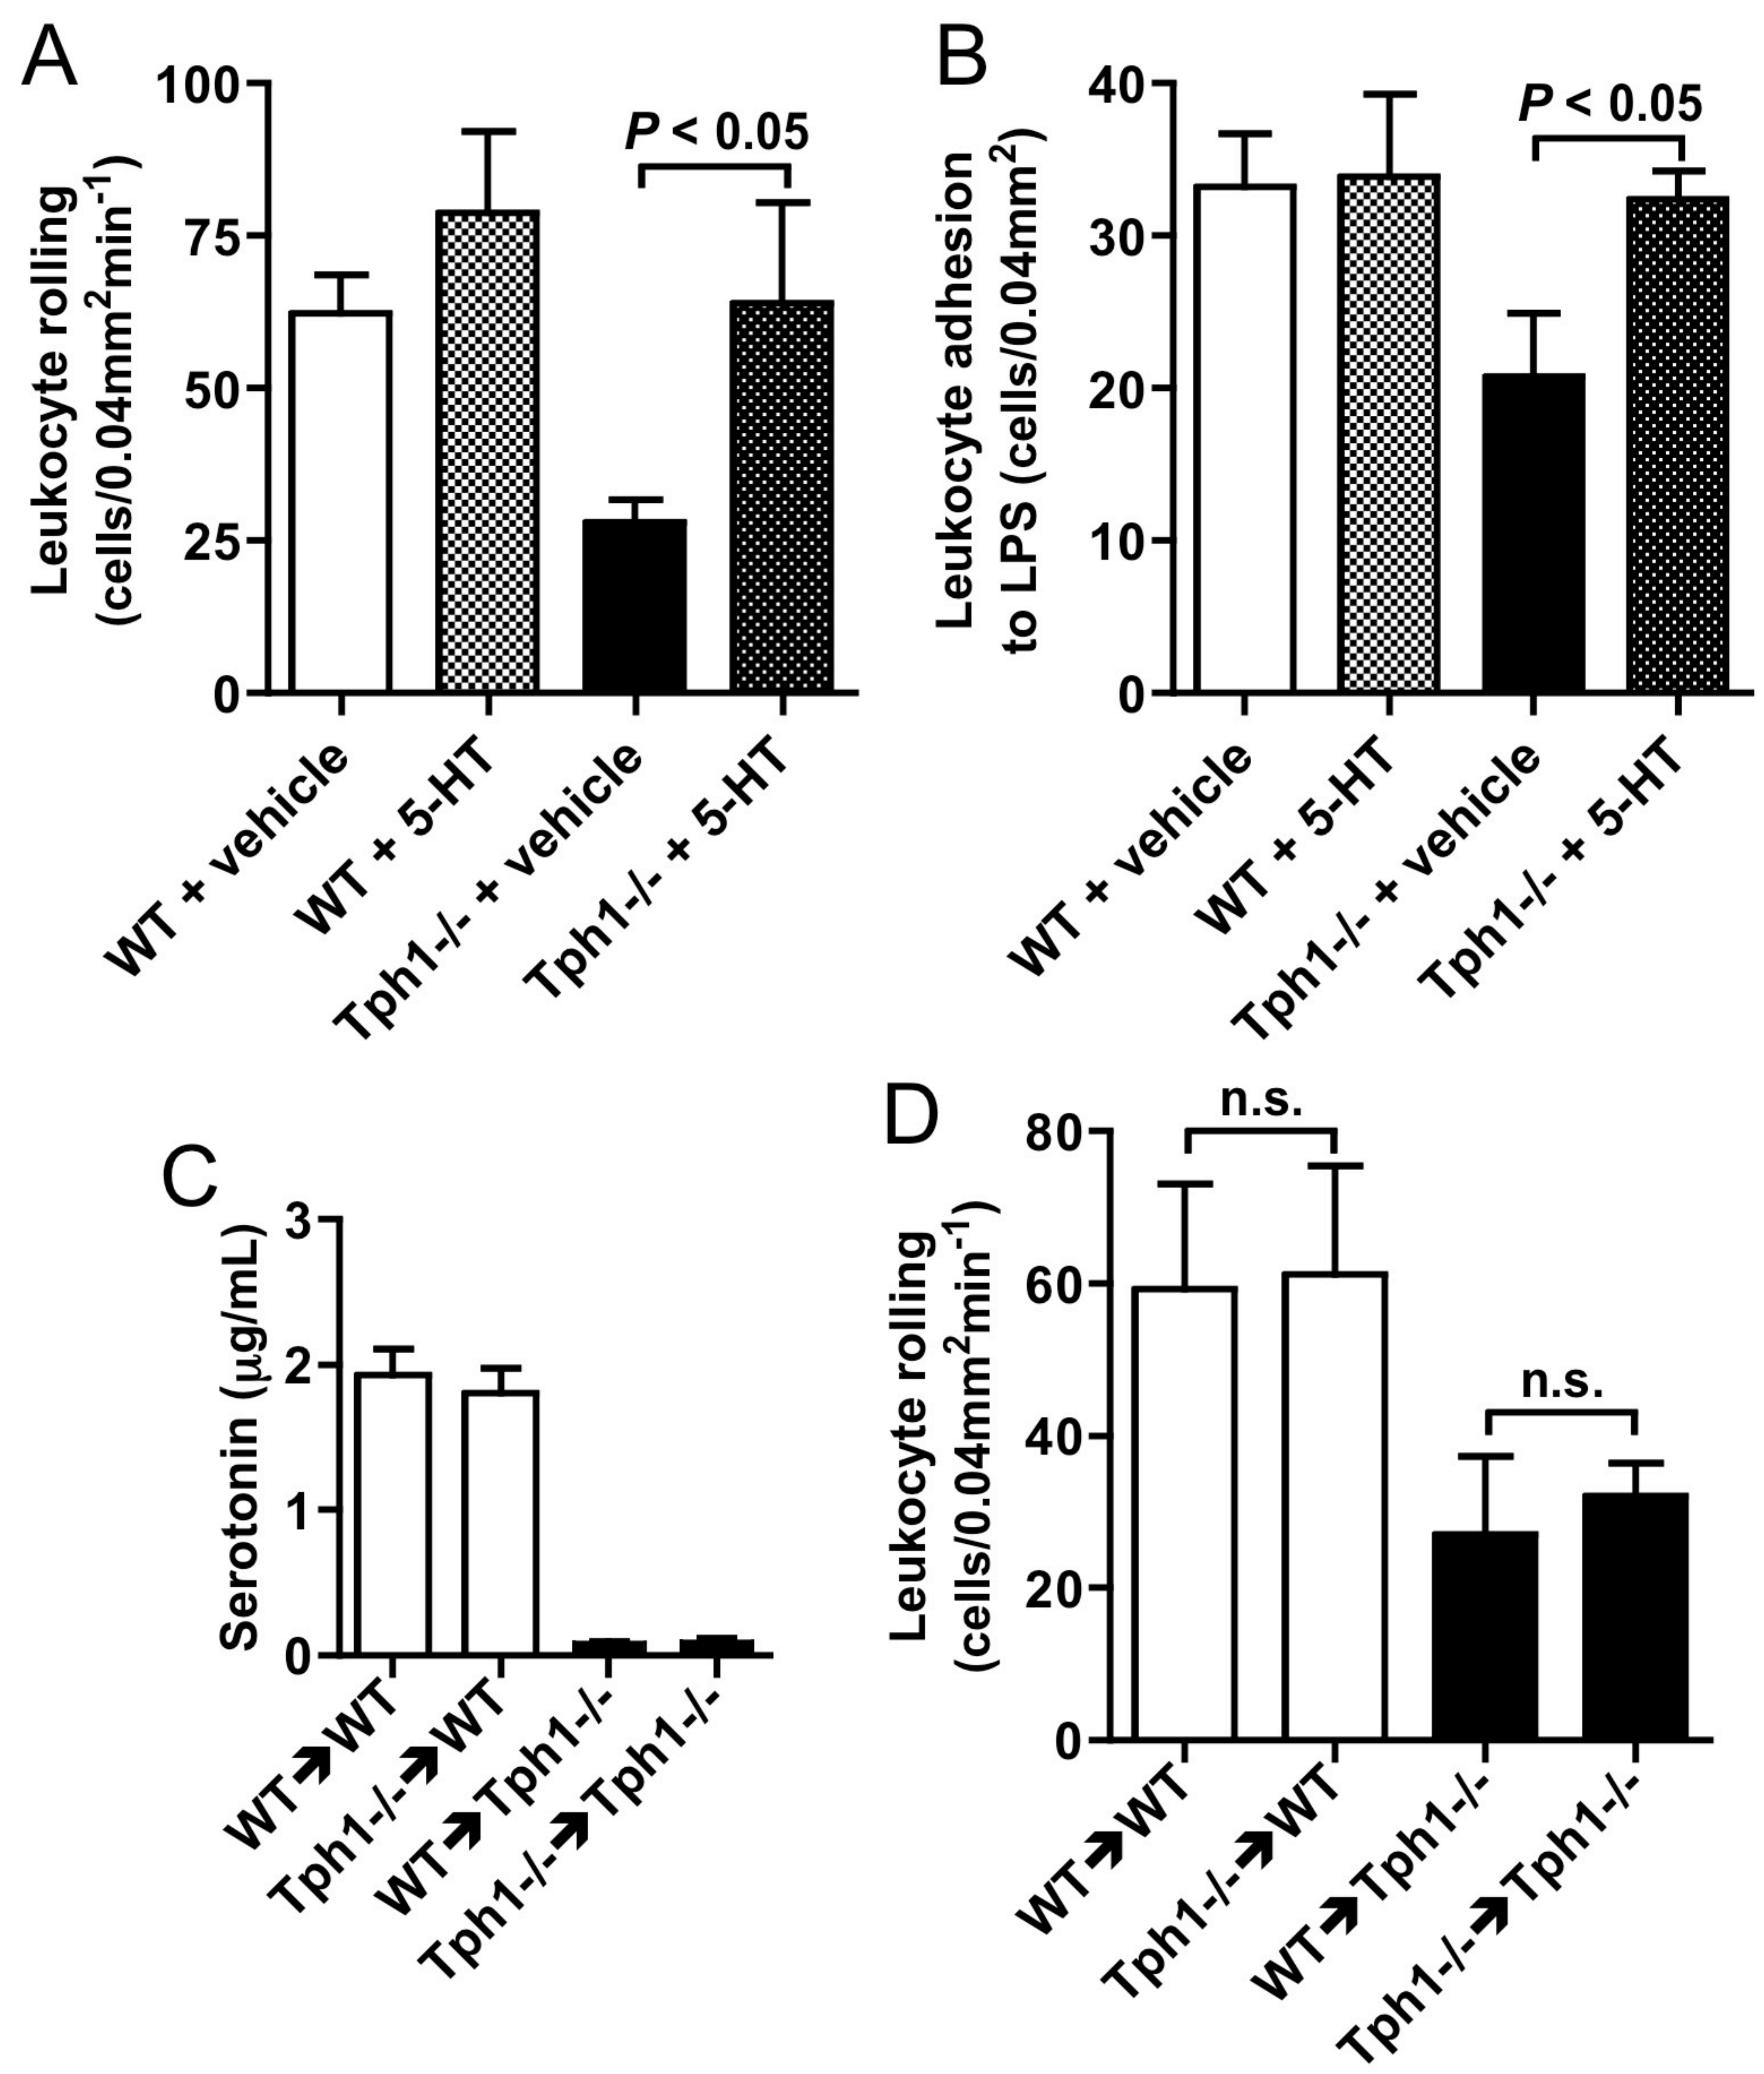

Supplement: supp_blood-2012-06-437392_blood-2012-06-437392-1.pdf [file supp_blood-2012-06-437392_blood-2012-06-437392-1.pdf]
